# Supplementary material for: Combining Comparative Proteomics and Molecular Genetics Uncovers Regulators of Synaptic and Axonal Stability and Degeneration In Vivo
Source: PubMed Central journal article supplement (PMC3431337; doi:10.1371/journal.pgen.1002936), 2012-08-30
Supplement: pgen.1002936.s001.pdf [file pgen.1002936.s001.pdf]

Table S1: All proteins with altered expression levels >20% in wild-type striatal synaptosome preparations at 24 and/or 48hrs after cortical lesion

| Accession Number | Symbol       | Protein Name                                                                     | Mol Weight (Da) | Peptides | Score | emPAI   | Average Ratio 24hrs vs Unlesioned | Average Ratio 48hrs vs Unlesioned |
|------------------|--------------|----------------------------------------------------------------------------------|-----------------|----------|-------|---------|-----------------------------------|-----------------------------------|
| IP00239927.4     | NFAC         | Neurofascin                                                                      | 155723          | 34       | 51.2  | 0.04    | 1.528                             | 2.030                             |
| IP00751955.1     | TMX2         | Putative Uncharacterized Protein Tmx2                                            | 23998           | 17       | 179.4 | 0.09    | 1.623                             | 1.623                             |
| IP00075866.1     | NMA1C5       | 23 KDa Protein                                                                   | 38769           | 15       | 386.7 | 0.15    | 1.431                             | 1.756                             |
| IP00487545.4     | PLNMA4       | Plexin-A4                                                                        | 250164          | 54       | 85.9  | 0.01    | 1.464                             | 1.694                             |
| IP004880340.4    | DCLK1        | Isomorph 1 of Serine/Threonine-Protein Kinase Dclk1                              | 200             | 79.2     | 0.30  | 1.00794 | 2.0                               | 1.402                             |
| IP00762713.1     | DNAJC5       | Isomorph 3 of Putative Tyrosine-Protein Phosphatase Auxilin                      | 123424          | 27       | 41.2  | 0.08    | 1.071                             | 1.454                             |
| IP00108150.1     | ROCK2        | Rho-Associated Protein Kinase 2                                                  | 206952          | 68       | 89.1  | 0.02    | 1.457                             | 1.453                             |
| IP00471728.1     | RPL14        | Putative Uncharacterized Protein                                                 | 134308          | 67       | 10.0  | 0.09    | 1.453                             | 1.453                             |
| IP00467530.3     | ABLIM1       | Isomorph 1 of Actin-Binding Lim Protein 1                                        | 115052          | 29       | 61.7  | 0.03    | 1.098                             | 1.428                             |
| IP00062506.3     | ANK3         | Brain-Specific Ankyrin-G                                                         | 577303          | 106      | 21.2  | 0.01    | 0.761                             | 1.427                             |
| IP00039564.1     | NSCAM        | Isomorph 3 of Neuronal Cell Adhesion Molecule                                    | 162929          | 18       | 82.0  | 0.02    | 1.349                             | 1.425                             |
| IP00122399.1     | GLG1         | Golgi Apparatus Protein 1                                                        | 164294          | 39       | 87.4  | 0.29    | 1.635                             | 1.424                             |
| IP00062174.7     | GLD1         | Lactoylglutathione Lyase                                                         | 26747           | 38       | 112.5 | 0.42    | 1.552                             | 1.424                             |
| IP00469897.3     | GFAT2        | Glutamine Deaminase                                                              | 59707           | 38       | 66.9  | 0.17    | 1.269                             | 1.419                             |
| IP00126048.2     | PSMD13       | Isomorph 1 of 26S Proteasome Non-ATPase Regulatory Subunit 13                    | 50425           | 14       | 52.6  | 0.07    | 0.967                             | 1.410                             |
| IP00039905.5     | PF3C3        | Liprin-Alpha-3                                                                   | 134308          | 79.4     | 0.02  | 1.451   | 1.409                             | 1.409                             |
| IP000331174.5    | CCT7         | T-Complex Protein 1 Subunit Eta                                                  | 73208           | 81       | 89.0  | 0.09    | 1.279                             | 1.400                             |
| IP00027033.3     | HIST2HZAC    | Histone H2A Type 2-C                                                             | 18543           | 9        | 170.1 | 0.95    | 1.360                             | 1.399                             |
| IP00022457.2     | DIRX5        | Aspartyl-TRNA Synthetase, Cytoplasmic Isomorph 1                                 | 66968           | 23       | 45.6  | 0.05    | 0.949                             | 1.398                             |
| IP000471246.2    | IVD          | Isovaleryl-Coa Dehydrogenase, Mitochondrial                                      | 54604           | 19       | 127.6 | 0.06    | 1.269                             | 1.391                             |
| IP00071166.4     | HIT1         | Huntingtin                                                                       | 385122          | 111      | 66.6  | 0.01    | 1.386                             | 1.388                             |
| IP00116331.1     | SCTA         | Isomorph 1 of Small Glutamine-Rich Tetratricopeptide Repeat-Containing Protein   | 38788           | 15       | 114.3 | 0.28    | 1.266                             | 1.376                             |
| IP00153176.2     | FBXO2        | F-Box Only Protein 2                                                             | 36678           | 5        | 56.8  | 0.09    | 0.576                             | 1.376                             |
| IP000524600.3    | PFAS         | Phosphoribosylformylglycinamide Synthase                                         | 159634          | 27       | 137.1 | 0.02    | 2.063                             | 1.365                             |
| IP000226790.2    | PIGT         | Loc10046871 Gpi Transamidase Component Pig-T                                     | 73344           | 20       | 92.9  | 0.04    | 1.602                             | 1.353                             |
| IP000230449.7    | HPCAL1       | Hippocalcin-Like Protein 1                                                       | 27914           | 17       | 119.0 | 0.40    | 1.114                             | 1.346                             |
| IP000890117.1    | CLF1         | Cofilin-1                                                                        | 26685           | 50       | 171.6 | 0.80    | 1.254                             | 1.343                             |
| IP00408668.2     | DLG1         | Loc10047603 Isomorph 1 of Disks Large Homolog 1                                  | 117797          | 27       | 82.5  | 0.03    | 1.063                             | 1.336                             |
| IP000624192.3    | DPYSL5       | Dihydropyrimidine-Related Protein 5                                              | 17182           | 32       | 161.4 | 0.09    | 1.128                             | 1.328                             |
| IP00054399.3     | ARS2         | Threonyl-TRNA Synthetase, Mitochondrial                                          | 134249          | 32       | 88.5  | 0.02    | 0.298                             | 1.327                             |
| IP000337930.4    | CKAP5        | Isomorph 1 of Cytoskeleton-Associated Protein 5                                  | 282550          | 73       | 257.7 | 0.02    | 1.538                             | 1.317                             |
| IP000652377.2    | WDK7         | Wdr7 Protein                                                                     | 183911          | 57       | 6.0   | 0.05    | 1.198                             | 1.317                             |
| IP00136716.1     | GRM3         | Metabotropic Glutamate Receptor 3                                                | 114621          | 20       | 35.7  | 0.06    | 1.283                             | 1.316                             |
| IP000318522.3    | GAD3         | Glutamate Decarboxylase 3                                                        | 77901           | 44       | 226.7 | 0.28    | 1.106                             | 1.311                             |
| IP00133284.1     | D10H8UE1     | Loc10046848 Est Protein Homolog, Mitochondrial                                   | 34949           | 84.1     | 13.0  | 20.0    | 1.411                             | 1.308                             |
| IP00468688.4     | TARS         | Threonyl-TRNA Synthetase, Cytoplasmic                                            | 103684          | 17       | 35.2  | 0.03    | 1.411                             | 1.306                             |
| IP00087896.1     | 64305480MRK1 | Hypothetical Protein Loc234797 Isomorph B                                        | 54772           | 5        | 48.6  | 0.06    | 1.246                             | 1.298                             |
| IP00018347.1     | SPPLC1       | 75 KDa Protein                                                                   | 87979           | 11       | 80.1  | 0.08    | 1.111                             | 1.297                             |
| IP00126072.2     | VAT1         | Synaptic Vesicle Membrane Protein Vat-1 Homolog                                  | 49381           | 11       | 109.8 | 0.07    | 0.974                             | 1.290                             |
| IP00079868.1     | USP9X        | Ubiquitin Carboxyl-Terminus Hydrolase 9                                          | 134308          | 61       | 64.1  | 0.02    | 1.031                             | 1.286                             |
| IP00054923.1     | CLTB         | Isomorph 2 of Clathrin Light Chain B                                             | 28446           | 15       | 40.8  | 0.39    | 0.995                             | 1.285                             |
| IP00137277.1     | RAB2A        | Ras-Related Protein Rab-2A                                                       | 27658           | 10       | 98.8  | 0.26    | 1.220                             | 1.278                             |
| IP00067436.2     | SMXO2        | Similar To Proteasome (Prosome, Macropain) 26S Subunit, Non-ATPase, 2 Isomorph 1 | 190622          | 6        | 158.6 | 0.41    | 0.033                             | 1.274                             |
| IP00134353.3     | NOL3         | Nucleolar Protein 3                                                              | 25693           | 6        | 87.4  | 0.13    | 1.393                             | 1.258                             |
| IP000890744.1    | DMX2         | Dmx-Like Protein 2                                                               | 392746          | 81       | 497.4 | 0.03    | 1.060                             | 1.256                             |
| IP00124291.1     | VPS45        | Vacuolar Protein Sorting-Associated Protein 45                                   | 77979           | 52.3     | 0.34  | 0.21    | 1.251                             | 1.251                             |
| IP00018614.9     | IDH2         | Isocitrate Dehydrogenase (NADP), Mitochondrial                                   | 62890           | 28       | 59.2  | 0.05    | 1.277                             | 1.249                             |
| IP00021577.1     | CPT1C        | Carnitine D-Palmitoyltransferase 1, Brain Isomorph                               | 15111           | 15.1     | 151.1 | 0.03    | 0.957                             | 1.247                             |
| IP000468112.2    | PRK-LL1      | Band 4.1-Like Protein 1 Isomorph A                                               | 118655          | 39       | 37.8  | 0.03    | 1.097                             | 1.248                             |
| IP00025961.5     | PHGDH        | D-3-Phosphoglycerate Dehydrogenase                                               | 65257           | 23       | 95.8  | 0.05    | 1.155                             | 1.239                             |
| IP000120503.1    | CGP81        | Customer Subunit Beta                                                            | 129432          | 41.7     | 67.0  | 0.03    | 0.902                             | 1.237                             |
| IP000223757.4    | AKR1B3       | Aldehyde Reductase                                                               | 44265           | 13       | 34.4  | 0.07    | 1.527                             | 1.232                             |
| IP00134344.6     | SPNB3        | Putative Uncharacterized Protein                                                 | 209135          | 78       | 83.1  | 0.05    | 1.025                             | 1.232                             |
| IP00118120.1     | MYO2A        | Myosin-II                                                                        | 187815          | 198      | 108.8 | 0.21    | 1.028                             | 1.231                             |
| IP00088106.1     | NAPC         | Putative Uncharacterized Protein Napp                                            | 49418           | 34       | 206.7 | 0.38    | 1.278                             | 1.217                             |
| IP00135952.2     | ITNA         | Alpha-Interneuron                                                                | 63789           | 47       | 127.5 | 0.15    | 1.057                             | 1.216                             |
| IP00030566.4     | CNG7         | Guanine Nucleotide-Binding Protein G(I)/G(S)/G(O) Subunit Gamma-7                | 9849            | 17       | 106.7 | 0.35    | 0.831                             | 1.216                             |
| IP00031351.3     | DPYSL4       | Isomorph 1 of Dihydropyrimidine-Related Protein 4                                | 72227           | 32       | 53.0  | 0.14    | 1.084                             | 1.210                             |
| IP000283511.1    | FOXK         | Foxk1 Protein                                                                    | 40753           | 261.7    | 40.1  | 0.73    | 1.009                             | 1.204                             |
| IP00116697.1     | RAB6         | Isomorph 1 of Ras-Related Protein Rab-6A                                         | 27948           | 26       | 60.0  | 0.25    | 1.241                             | 1.195                             |
| IP00118900.1     | POE1B        | Calcium/Calmodulin-Dependent 3',5'-Cyclic Nucleotide Phosphodiesterase 1B        | 71130           | 25       | 166.3 | 0.09    | 1.277                             | 1.173                             |
| IP00120342.6     | SLC11R6      | Solute Carrier Family 12 (Sodium/Proton) Cotransporter 2                         | 74329           | 23       | 114.8 | 0.19    | 1.168                             | 1.169                             |
| IP000273164.1    | ALDH5A1      | Succinate-Semialdehyde Dehydrogenase, Mitochondrial                              | 66542           | 43       | 126.4 | 0.21    | 1.245                             | 1.168                             |
| IP00030808.5     | UNC13A       | Putative Uncharacterized Protein Unc13A                                          | 244240          | 39       | 81.6  | 0.01    | 1.291                             | 1.164                             |
| IP00067851.1     | CADPS2       | Isomorph 1 of Calcium-Dependent Secretion Activator 2                            | 75106           | 69       | 69.4  | 0.09    | 1.149                             | 1.164                             |
| IP00012305.2     | SYP          | Synaptophysin                                                                    | 38546           | 53       | 152.5 | 0.78    | 1.265                             | 1.161                             |
| IP00061232.3     | HSOL7B10     | Hydroxyesterase (17-Beta) Dehydrogenase 10                                       | 22749           | 37       | 23.4  | 0.24    | 1.137                             | 1.137                             |
| IP00115429.1     | GGT7         | Gamma-Glutamyltransferase 7                                                      | 74611           | 23       | 187.8 | 0.04    | 1.285                             | 1.137                             |
| IP00028645.5     | PFN2         | Isomorph 1 of Profilin-2                                                         | 18406           | 18       | 50.6  | 0.66    | 1.320                             | 1.135                             |
| IP00108783.1     | NF1          | Isomorph 2 of Neurofibromin                                                      | 175725          | 41       | 158.5 | 0.45    | 1.001                             | 1.131                             |
| IP00095134.1     | ARPC4        | Putative Uncharacterized Protein                                                 | 24068           | 54       | 76.1  | 0.68    | 1.273                             | 1.129                             |
| IP00116277.3     | CCT4         | T-Complex Protein 1 Subunit Delta                                                | 70711           | 34       | 804.5 | 0.15    | 1.316                             | 1.125                             |
| IP00129519.3     | CTD4         | Brain Acid Soluble Protein 4                                                     | 30896           | 6        | 626.5 | 0.10    | 1.232                             | 1.115                             |
| IP00127707.1     | PCBP2        | Isomorph 1 of Poly(Rc)-Binding Protein 2                                         | 44072           | 23       | 34.8  | 0.07    | 1.203                             | 1.105                             |
| IP00118663.3     | MAPK1        | Mitogen-Activated Protein Kinase 1                                               | 48949           | 118      | 119.8 | 0.48    | 1.097                             | 1.103                             |
| IP00118880.5     | GUCY1B3      | Guanylate Cyclase Soluble Subunit Beta-1                                         | 81390           | 28       | 70.2  | 0.08    | 1.201                             | 1.093                             |
| IP00112414.1     | CSEL1        | Expontin-2                                                                       | 129131          | 31       | 41.0  | 0.03    | 1.237                             | 1.090                             |
| IP00112001.1     | CA92         | Adenylyl Cyclase-Associated Protein 2                                            | 63353           | 36.5     | 20.1  | 1.11    | 1.066                             | 1.085                             |
| IP00135677.2     | EHD3         | EH Domain-Containing Protein 3                                                   | 74833           | 28       | 128.2 | 0.09    | 1.809                             | 1.080                             |
| IP00030844.3     | SPARCL1      | Sparc-Like Protein 1                                                             | 68814           | 24       | 40.2  | 0.04    | 1.268                             | 1.076                             |
| IP000471232.2    | WASH1        | Wiskott-Aldrich Syndrome Protein Family Member 1                                 | 93261           | 26.3     | 8.6   | 0.26    | 1.066                             | 1.074                             |
| IP00025470.1     | GPHN         | Gephyrin                                                                         | 95227           | 31       | 260.0 | 0.07    | 1.399                             | 1.070                             |
| IP00041883.3     | ACA1A1       | 3-Hydroxy-Coa Thioester, Peroxisomal                                             | 49553           | 13       | 120.5 | 0.15    | 1.019                             | 1.072                             |
| IP00041883.3     | AAB3B        | Ras-Related Protein Rab-3B                                                       | 19532           | 31       | 152.5 | 0.71    | 1.221                             | 1.072                             |
| IP00084909.4     | MTAF1A       | Isomorph 1 of Microtubule-Associated Protein 1A                                  | 369950          | 61       | 69.1  | 0.02    | 0.783                             | 1.067                             |
| IP00083056.1     | DPY10        | Putative Uncharacterized Protein Dpy10                                           | 100667          | 35       | 103.7 | 0.06    | 1.067                             | 1.066                             |
| IP00024093.2     | PHYHIP1      | Isomorph 1 of Phytanoyl-Coa Hydroxylase-Interacting Protein-Like                 | 51706           | 11       | 45.7  | 0.06    | 0.566                             | 1.040                             |
| IP00031995.3     | PSMD6        | 26S Proteasome Non-ATPase Regulatory Subunit 6                                   | 54006           | 26       | 60.0  | 0.06    | 0.767                             | 1.034                             |
| IP00122747.1     | GRM6         | Neuronal Membrane G-Protein Receptor 6                                           | 35824           | 4        | 115.2 | 0.42    | 1.213                             | 1.032                             |
| IP00111013.1     | CTSD         | Cathepsin D                                                                      | 54507           | 44       | 48.0  | 0.19    | 1.252                             | 1.028                             |
| IP00082723.1     | ARKS27       | Isomorph G of Rho Guanine Nucleotide Exchange Factor 7                           | 109939          | 30       | 206.1 | 0.06    | 1.209                             | 1.026                             |
| IP00061995.4     | MYO18A       | Isomorph 3 of Myosin-Xviii                                                       | 281702          | 57       | 77.9  | 0.01    | 0.402                             | 1.025                             |
| IP00033660.4     | DLAT         | Dihydropyridine-Residue Acetyltransferase/Component of Pyruvate Dehydrogenase    | 80941           | 24       | 94.5  | 0.08    | 0.792                             | 1.005                             |
| IP00077867.1     | SLC14A2      | Solute Carrier Family 14 (Sodium/Potassium/Calcium Exchanger), Member 2 Isomorph | 79907           | 27       | 222.2 | 0.14    | 1.004                             | 1.002                             |
| IP00032360.4     | CORO1A       | Coronin-1A                                                                       | 58638           | 19       | 36.3  | 0.12    | 1.233                             | 0.993                             |
| IP00033033.7     | LOC100046997 | Atc-Bifunctional Purine Biosynthesis Protein Purh                                | 75338           | 14       | 89.4  | 0.04    | 1.233                             | 0.989                             |
| IP000890311.1    | LOC100044110 | Similar To Guanine Nucleotide Binding Protein, Alpha 2 Subunit                   | 47346           | 17       | 107.0 | 0.07    | 1.031                             | 0.987                             |
| IP00118735.5     | PPP1CB       | Serine/Threonine-Protein Phosphatase Pp1-Beta Subunit                            | 44045           | 17       | 36.2  | 0.16    | 0.795                             | 0.986                             |
| IP00128880.3     | IFP4         | Interph-4                                                                        | 133096          | 45       | 42.8  | 0.02    | 1.296                             | 0.984                             |
| IP00131696.3     | ALB          | Serum Albumin                                                                    | 68519           | 55       | 5.5   | 0.08    | 0.555                             | 0.984                             |
| IP000464208.3    | ATAD3A       | Isomorph 2 of Atadp Family Aaa Domain-Containing Protein 3                       | 68154           | 19       | 58.7  | 0.05    | 1.544                             | 0.969                             |
| IP00123966.3     | PP1D         | Ppp1gamma-Prolyl Coa-Trans Isomerase D                                           | 53388           | 68       | 79.0  | 0.06    | 0.683                             | 0.968                             |
| IP00133387.1     | HSP41        | Heat Shock Factor-Binding Protein 1                                              | 10430           | 5        | 25.5  | 0.77    | 0.641                             | 0.944                             |
| IP00031999.2     | HSPA1        | 78 KDa Glucose-Regulated Protein 1                                               | 91352           | 58       | 205.4 | 0.19    | 0.781                             | 0.940                             |
| IP00118963.1     | MRPL12       | 35S Ribosomal Protein L12, Mitochondrial                                         | 77589           | 67       | 114.2 | 0.76    | 0.620                             | 0.937                             |
| IP00025390.5     | CXO6B1       | Cytochrome C Oxidase Subunit 6B1                                                 | 13335           | 9        | 63.0  | 0.26    | 0.703                             | 0.916                             |
| IP00124778.1     | BLIAF2       | Isomorph 2 of Brain-Specific Angiogenesis Inhibitor 1-Associated Protein 2       | 70869           | 31       | 85.6  | 0.05    | 0.796                             | 0.915                             |
| IP00068972.4     | GUCY1A2      | Loc10004215 Guanylate Cyclase 1, Soluble, Alpha 2                                | 96000           | 13       | 446.3 | 0.07    | 0.637                             | 0.907                             |
| IP00113849.1     | CDC42        | Isomorph 2 of Cell Division Control 2/42 Homolog                                 | 27063           | 11       | 49.7  | 0.26    | 0.711                             | 0.907                             |
| IP00134746.5     | AS51         | Acquisinucleonin Synthase                                                        | 57183           | 59.3     | 59.3  | 0.12    | 0.780                             | 0.905                             |
| IP00119138.1     | UQCRC2       | Cytochrome B-C1 Complex Subunit 2, Mitochondrial                                 | 56780           | 46       | 142.8 | 0.12    | 0.717                             | 0.898                             |
| IP00116112.3     | DCTN2        | Dynactin Subunit 2                                                               | 54243           | 20       | 37.8  | 0.19    | 0.621                             | 0.889                             |
| IP00125011.1     | PRK-LL3      | Isomorph 1 of Band 4.1-Like Protein 3                                            | 14721           | 11       | 145.0 | 0.11    | 1.040                             | 0.881                             |
| IP000850217.1    | LOC100004619 | Similar To Ubiquitin-Conjugating Enzyme E2 Ubch-Ben                              | 29691           | 17       | 91.2  | 0.24    | 0.795                             | 0.880                             |
| IP000378694.4    | HMGCL        | Hydroxymethylglutaryl-Coa Lyase, Mitochondrial Precursor                         | 41365           | 12       | 57.6  | 0.08    | 0.639                             | 0.877                             |
| IP00121524.11    | CAR2         | Carbonic Anhydrase 2                                                             | 32113           | 14.3     | 123.1 | 0.43    | 1.034                             | 0.874                             |
| IP000123058.1    | CNTN1        | Contactin-1                                                                      | 131512          | 61       | 134.7 | 0.13    | 1.050                             | 0.870                             |
| IP000221788.3    | HPCAL4       | Hippocalcin-Like Protein 4                                                       | 27848           | 39       | 90.6  | 0.16    | 0.725                             | 0.863                             |
| IP000340165.5    | N/A          | Putative Uncharacterized Protein Ensmus00000002571                               | 25217           | 59       | 218.7 | 0.65    | 0.761                             | 0.859                             |
| IP00078764.6     | VGF</        |                                                                                  |                 |          |       |         |                                   |                                   |
