# Supplementary material for: Combining Comparative Proteomics and Molecular Genetics Uncovers Regulators of Synaptic and Axonal Stability and Degeneration In Vivo
Source: PubMed Central journal article supplement (PMC3431337; doi:10.1371/journal.pgen.1002936), 2012-08-30
Supplement: pgen.1002936.s002.pdf [file pgen.1002936.s002.pdf]

Table S2: All proteins with altered expression levels >20% in WtS striatal synaptosome preparations at 24 and/or 48hrs after cortical lesion

| Accession Number | Protein Name    | Mol Weight (Da) | Peptides | Score | eMFI  | Average Ratio 24hrs vs Unlesioned | Average Ratio 48hrs vs Unlesioned |
|------------------|-----------------|-----------------|----------|-------|-------|-----------------------------------|-----------------------------------|
| FP00223774       | AOL18L1         | 4266            | 18       | 34.4  | 1.79  | 1.42                              | 1.42                              |
| FP00137087       | AFGEF2          | 23771           | 18       | 76.1  | 0.01  | 1.22                              | 1.87                              |
| FP00112173       | AFPC2           | 13539           | 8        | 89.0  | 0.01  | 1.45                              | 1.80                              |
| FP00330754       | B0H1            | 45603           | 33       | 213.3 | 0.07  | 1.50                              | 1.79                              |
| FP00221383       | HIC4            | 27948           | 13       | 96.5  | 0.04  | 1.37                              | 1.60                              |
| FP00128614       | GLY1B3          | 146604          | 11       | 145.3 | 0.02  | 1.21                              | 1.62                              |
| FP00118805       | GLY1B5          | 81390           | 28       | 70.2  | 0.08  | 1.474                             | 1.566                             |
| FP00111218       | ALDH7           | 66445           | 13       | 66.4  | 0.10  | 1.41                              | 1.54                              |
| FP00448372       | TBCD            | 151206          | 15       | 40.6  | 0.02  | 1.13                              | 1.54                              |
| FP00081197       | ME1             | 76100           | 33       | 118.0 | 0.13  | 1.10                              | 1.49                              |
| FP00126072       | VAT1            | 49381           | 11       | 109.8 | 0.07  | 1.07                              | 1.46                              |
| FP00049203       | HMW1            | 45336           | 83       | 43.0  | 0.01  | 1.59                              | 1.44                              |
| FP00227593       | VATL1           | 55561           | 50       | 191.1 | 0.19  | 1.12                              | 1.45                              |
| FP00229602       | PIOT            | 73344           | 20       | 52.0  | 0.04  | 1.60                              | 1.43                              |
| FP00333603       | LOC10040995     | 75338           | 14       | 89.4  | 0.04  | 1.29                              | 1.43                              |
| FP00136936       | VPS29           | 24913           | 24       | 45.1  | 0.13  | 1.48                              | 1.36                              |
| FP00283532       | OSTF2           | 32668           | 25       | 75.0  | 0.11  | 1.02                              | 1.38                              |
| FP00441286       | PPM1E           | 95287           | 43       | 162.4 | 0.07  | 1.34                              | 1.34                              |
| FP00153716       | NCCO2           | 66400           | 17       | 26.2  | 0.16  | 1.09                              | 1.23                              |
| FP00132314       | MUCB1           | 62502           | 22       | 68.6  | 0.05  | 1.18                              | 1.25                              |
| FP00265822       | PPP1CB          | 40456           | 17       | 26.2  | 0.16  | 1.09                              | 1.23                              |
| FP00118136       | PPP1R5C         | 74570           | 32       | 147.2 | 0.04  | 1.39                              | 1.310                             |
| FP00265822       | ALDH1A1         | 6752            | 21       | 63.1  | 0.15  | 1.24                              | 1.30                              |
| FP00111091       | CTSD            | 54507           | 44       | 48.0  | 0.19  | 1.00                              | 1.30                              |
| FP00442611       | AFB1            | 143469          | 39       | 81.0  | 0.02  | 1.15                              | 1.30                              |
| FP00153740       | AHSA1           | 47143           | 17       | 137.9 | 0.14  | 1.25                              | 1.29                              |
| FP00138961       | JSD2            | 14238           | 4        | 69.0  | 0.15  | 1.24                              | 1.29                              |
| FP00757202       | ANGEL2          | 69077           | 17       | 75.4  | 0.05  | 1.32                              | 1.29                              |
| FP00129479       | PPANCC          | 57820           | 11       | 55.8  | 0.06  | 1.15                              | 1.28                              |
| FP00118821       | PRKAB1B2        | 30279           | 26       | 44.7  | 0.13  | 1.02                              | 1.29                              |
| FP00119130       | ETFB07          | 15221           | 18       | 295.8 | 0.19  | 1.17                              | 1.27                              |
| FP00121514       | CARD2           | 32513           | 14       | 121.1 | 0.13  | 1.06                              | 1.27                              |
| FP00157903       | CYLB            | 46385           | 21       | 66.8  | 0.07  | 0.93                              | 1.26                              |
| FP00445421       | PILOT2          | 52147           | 10       | 48.7  | 0.16  | 1.18                              | 1.24                              |
| FP00117721       | GABRI1          | 61683           | 13       | 48.3  | 0.05  | 1.07                              | 1.24                              |
| FP00226004       | CORO1A          | 58632           | 14       | 88.2  | 0.12  | 1.25                              | 1.24                              |
| FP00275470       | PFMS12          | 109523          | 40       | 120.7 | 0.05  | 1.07                              | 1.29                              |
| FP00124631       | LOC10044138     | 18475           | 18       | 164.6 | 0.15  | 1.29                              | 1.29                              |
| FP00080811       | ALBA            | 23647           | 19       | 35.3  | 0.14  | 1.04                              | 1.24                              |
| FP00120874       | MGLL            | 42736           | 15       | 79.9  | 0.14  | 1.04                              | 1.24                              |
| FP00119346       | CALB2           | 39680           | 25       | 41.9  | 0.17  | 0.92                              | 1.23                              |
| FP00127023       | TST             | 81941           | 12       | 127.3 | 0.22  | 1.04                              | 1.23                              |
| FP00108124       | EIF5A           | 21308           | 12       | 137.6 | 0.55  | 1.14                              | 1.216                             |
| FP00127271       | PRKX            | 89268           | 8        | 206.4 | 0.07  | 1.04                              | 1.216                             |
| FP00230922       | HADHA           | 103683          | 39       | 60.9  | 0.03  | 1.04                              | 1.206                             |
| FP00126019       | BAB3B           | 70976           | 17       | 174.5 | 0.24  | 1.04                              | 1.206                             |
| FP00221571       | OPF1C           | 97634           | 19       | 151.1 | 0.03  | 1.04                              | 1.203                             |
| FP00110426       | TRIP11          | 116500          | 30       | 114.0 | 0.03  | 1.04                              | 1.203                             |
| FP00130598       | SOD1            | 19146           | 30       | 154.4 | 1.25  | 1.28                              | 1.197                             |
| FP00224475       | IL22            | 22437           | 4        | 224.6 | 0.17  | 1.22                              | 1.197                             |
| FP00469872       | GDA             | 59707           | 39       | 66.9  | 0.17  | 1.36                              | 1.184                             |
| FP00119018       | PROS1B          | 71106           | 10       | 89.0  | 0.17  | 1.36                              | 1.184                             |
| FP00159954       | NYG18A          | 281702          | 75       | 77.9  | 0.01  | 1.274                             | 1.158                             |
| FP00440393       | NL1             | 10438           | 10       | 214.7 | 0.17  | 1.18                              | 1.158                             |
| FP00118961       | MHRP12          | 27589           | 7        | 114.2 | 0.26  | 0.835                             | 1.151                             |
| FP00187544       | PLNM4           | 205144          | 54       | 85.9  | 0.01  | 1.42                              | 1.142                             |
| FP00127941       | GTLN            | 25544           | 13       | 11.9  | 0.28  | 1.14                              | 1.142                             |
| FP00127981       | TYRO2           | 26111           | 10       | 96.6  | 0.13  | 1.530                             | 1.125                             |
| FP00220282       | CSCP            | 52789           | 17       | 148.1 | 0.16  | 1.56                              | 1.124                             |
| FP00124630       | NTSC            | 26028           | 33       | 271.7 | 0.13  | 1.59                              | 1.110                             |
| FP00168902       | STX15           | 34142           | 17       | 44.9  | 0.10  | 1.07                              | 1.108                             |
| FP00136871       | SLC18A1         | 79461           | 36       | 197.0 | 0.27  | 0.78                              | 1.097                             |
| FP00131693       | ALS             | 86519           | 30       | 55.5  | 0.08  | 1.45                              | 1.097                             |
| FP00121613       | DTN2            | 54243           | 20       | 37.8  | 0.19  | 0.78                              | 1.095                             |
| FP00225307       | SARS            | 77460           | 8        | 235.7 | 0.13  | 1.24                              | 1.095                             |
| FP00123242       | HYD1            | 153372          | 25       | 43.1  | 0.02  | 1.33                              | 1.093                             |
| FP00122211       | FBLN1           | 89268           | 28       | 30.0  | 0.04  | 0.87                              | 1.093                             |
| FP00782211       | SBF1            | 232709          | 33       | 126.4 | 0.04  | 0.824                             | 1.061                             |
| FP00406822       | DIG1            | 100023          | 10       | 45.5  | 0.13  | 0.82                              | 1.059                             |
| FP00580731       | KPNA6           | 68216           | 15       | 59.5  | 0.05  | 1.31                              | 1.059                             |
| FP00457081       | FKBP12A         | 58215           | 10       | 148.7 | 0.06  | 1.12                              | 1.059                             |
| FP00134746       | ASS1            | 57183           | 23       | 59.3  | 0.12  | 0.723                             | 1.052                             |
| FP00120030       | CYR1            | 19              | 178.2    | 0.87  | 1.05  | 1.052                             | 1.052                             |
| FP00138716       | PA2B2           | 24370           | 7        | 61.5  | 0.14  | 0.863                             | 1.046                             |
| FP00132973       | LOC10040995     | 88              | 104.3    | 0.17  | 0.863 | 1.046                             | 1.046                             |
| FP00095134       | APRC4           | 24068           | 54       | 76.1  | 0.68  | 1.257                             | 1.035                             |
| FP00124631       | DPY4            | 100607          | 10       | 100.6 | 0.17  | 1.03                              | 1.035                             |
| FP00131844       | IDH2            | 62890           | 28       | 59.2  | 0.05  | 0.683                             | 1.018                             |
| FP00121441       | CENPA1          | 18641           | 10       | 89.0  | 0.17  | 0.863                             | 1.018                             |
| FP00275081       | MTMR1           | 87567           | 18       | 105.0 | 0.04  | 0.785                             | 1.014                             |
| FP00220021       | VTPPA           | 41227           | 27       | 48.5  | 0.17  | 0.839                             | 1.013                             |
| FP00131463       | VITL1A          | 20402           | 13       | 115.4 | 0.12  | 0.871                             | 0.992                             |
| FP00127941       | SRAL2A          | 87928           | 44       | 28.8  | 0.14  | 0.86                              | 0.992                             |
| FP00224027       | DARS            | 64998           | 23       | 45.6  | 0.05  | 0.817                             | 0.987                             |
| FP00122401       | SANP1           | 29789           | 17       | 167.8 | 0.17  | 0.87                              | 0.987                             |
| FP00762182       | HBB-B1          | 19911           | 27       | 103.3 | 0.86  | 1.203                             | 0.981                             |
| FP00137271       | HABD4           | 27962           | 10       | 96.8  | 0.17  | 0.86                              | 0.981                             |
| FP00224570       | PKAK2B          | 53534           | 55       | 186.7 | 0.35  | 1.29                              | 0.980                             |
| FP00127023       | HIST1H2AC       | 18543           | 9        | 101.9 | 0.05  | 0.73                              | 0.973                             |
| FP00133571       | TPP3            | 27843           | 7        | 46.0  | 0.12  | 0.85                              | 0.970                             |
| FP00051182       | GBA5            | 38025           | 8        | 114.4 | 0.18  | 0.81                              | 0.968                             |
| FP00262793       | GLL3            | 49526           | 62       | 456.6 | 0.57  | 0.76                              | 0.967                             |
| FP00152604       | 1110020098X     | 50239           | 10       | 41.7  | 0.07  | 0.76                              | 0.967                             |
| FP00274327       | DNM3            | 115173          | 96       | 201.6 | 0.22  | 0.875                             | 0.962                             |
| FP00144212       | NERF1           | 104321          | 15       | 40.7  | 0.04  | 0.729                             | 0.954                             |
| FP00129031       | AKL3L1AKL3L2-PS | 29115           | 10       | 51.7  | 0.11  | 1.252                             | 0.956                             |
| FP00152604       | DLAT            | 48461           | 14       | 94.5  | 0.08  | 0.87                              | 0.956                             |
| FP00109101       | SOD2            | 29887           | 26       | 223.0 | 0.52  | 0.797                             | 0.951                             |
| FP00469122       | NTSD3           | 74149           | 19       | 28.8  | 0.05  | 0.87                              | 0.951                             |
| FP00331791       | SYNCR3          | 25886           | 11       | 111.5 | 0.28  | 0.715                             | 0.947                             |
| FP00548141       | GCN4L3          | 59236           | 6        | 58.6  | 0.06  | 0.96                              | 0.946                             |
| FP00131962       | UCHL1           | 30336           | 68       | 122.4 | 0.87  | 0.834                             | 0.943                             |
| FP00127941       | UCLN1           | 70356           | 13       | 47.4  | 0.09  | 0.942                             | 0.943                             |
| FP00081096       | MARF            | 49418           | 34       | 206.7 | 0.38  | 0.862                             | 0.941                             |
| FP00124631       | PPM1R           | 127427          | 9        | 26.0  | 0.17  | 0.97                              | 0.941                             |
| FP00159954       | LINA            | 45335           | 104      | 41.4  | 0.76  | 0.875                             | 0.932                             |
| FP00440393       | LOC10040995     | 103948          | 17       | 84.2  | 0.03  | 0.927                             | 0.932                             |
| FP00229735       | VAMP2           | 15173           | 17       | 88.3  | 0.83  | 0.863                             | 0.926                             |
| FP00049723       | CADM1           | 42762           | 7        | 99.4  | 0.16  | 0.824                             | 0.926                             |
| FP00179644       | HNRG1A          | 41265           | 10       | 149.5 | 0.17  | 1.270                             | 0.916                             |
| FP00469122       | LOC10040995     | 150472          | 15       | 47.2  | 0.02  | 0.712                             | 0.914                             |
| FP00220822       | ODD1            | 39500           | 15       | 227.6 | 1.17  | 0.861                             | 0.900                             |
| FP00262111       | DNAAF1          | 124204          | 17       | 41.2  | 0.07  | 0.872                             | 0.900                             |
| FP00224740       | PRF1            | 18161           | 16       | 68.6  | 0.07  | 0.804                             | 0.882                             |
| FP00548142       | PP5L1           | 41727           | 33       | 72.6  | 0.16  | 0.75                              | 0.882                             |
| FP00240734       | PNX2            | 69928           | 276      | 218.0 | 2.96  | 0.863                             | 0.876                             |
| FP00130551       | RASGE1          | 51              | 372.6    | 1.0   | 1.0   | 0.831                             | 0.876                             |
| FP00080839       | HSP90           | 90128           | 66       | 169.0 | 0.20  | 0.869                             | 0.874                             |
| FP00119023       | TRPP            | 32041           | 66       | 333.2 | 0.86  | 1.262                             | 0.874                             |
| FP00154291       | CGIT7           | 74611           | 23       | 187.8 | 0.04  | 0.761                             | 0.867                             |
| FP00162793       | CCT5            | 74611           | 23       | 187.8 | 0.04  | 0.761                             | 0.867                             |
| FP00118496       | GAD1            | 79819           | 26       | 464.4 | 0.08  | 0.564                             | 0.860                             |
| FP00131401       | STX18           | 58428           | 18       | 664.6 | 1.15  | 0.794                             | 0.860                             |
| FP00125266       | ALDH1           | 53254           | 10       | 50.4  | 0.06  | 0.835                             | 0.857                             |
| FP00469122       | LOC10040995     | 118248          | 9        | 61.7  | 0.03  | 0.794                             | 0.857                             |
| FP00111501       | CPX2            | 21887           | 44       | 105.2 | 1.35  | 0.783                             | 0.838                             |
| FP00124631       | PHF1            | 94455           | 52       | 270.0 | 1.14  | 0.779                             | 0.836                             |
| FP00122811       | CNGB1           | 10262           | 12       | 84.5  | 0.06  | 0.86                              | 0.836                             |
| FP00127408       | KAC1            | 10262           | 18       | 35.8  | 0.23  | 0.857                             | 0.834                             |
| FP00470961       | RTN3            | 124232          | 3        | 79.4  | 0.03  | 0.794                             | 0.834                             |
| FP00123518       | UPLA2           | 28770           | 8        | 56.7  | 0.12  | 0.714                             | 0.826                             |
| FP00469122       | LOC10040995     | 62486           | 69       | 89.1  | 0.06  | 0.824                             | 0.826                             |
| FP00159954       | NAG1            | 53467           | 10       | 28.2  | 0.13  | 0.779                             | 0.824                             |
| FP00262793       | ACTY11          | 71861           | 45       | 137.6 | 1.14  | 1.472                             | 0.818                             |
| FP00176381       | ACAT1           | 46288           | 15       | 145.9 | 0.02  | 1.239                             | 0.817                             |
| FP00221208       | AOR1            | 27166           | 38       | 178.1 | 0.05  | 0.875                             | 0.799                             |
| FP00551462       | HNR3            | 79719           | 11       | 179.8 | 0.09  | 1.087                             | 0.794                             |
| FP00552327       | WOR1            | 18911           | 10       | 57.6  | 0.05  | 0.978                             | 0.790                             |
| FP00111512       | BRIN3A          | 72571           | 10       | 113.0 | 0.05  | 0.846                             | 0.787                             |
| FP00111556       | PPP1CB          | 39773           | 16       | 36.2  | 0.17  | 0.846                             | 0.787                             |
| FP00111512       | PPP1R5C         | 81507           | 18       | 34.7  | 0.11  | 0.846                             | 0.787                             |
| FP00282731       | FEI1            | 109939          | 30       | 230.1 | 0.06  | 0.948                             | 0.783                             |
| FP00178746       | VGF             | 72507           | 40       | 264.7 | 0.05  | 0.684                             | 0.776                             |
| FP001380795      | FOXA2           | 36648           | 17       | 78.3  | 0.09  | 0.982                             | 0.767                             |
| FP00454049       | ECHS1           | 38850           | 20       | 113.7 | 0.09  | 0.891                             | 0.774                             |
| FP00135712       | FDX3            | 128213          | 18       | 128.2 | 0.13  | 0.823                             | 0.774                             |
| FP00170905       | GIT1            | 98822           | 39       | 63.3  | 0.07  | 0.870                             | 0.773                             |
| FP00299955       | PP1A3           | 124368          | 12       | 79.4  | 0.02  | 0.958                             | 0.773                             |
| FP00580731       | LOC10044107     | 47              |          |       |       |                                   |                                   |
