# Supplementary material for: Combining Comparative Proteomics and Molecular Genetics Uncovers Regulators of Synaptic and Axonal Stability and Degeneration In Vivo
Source: PubMed Central journal article supplement (PMC3431337; doi:10.1371/journal.pgen.1002936), 2012-08-30
Supplement: pgen.1002936.s003.pdf [file pgen.1002936.s003.pdf]

Table S3: Proteins with altered expression levels >20% in striatal synapse-enriched preparations from wild-type mice 48hrs after cortical lesion

| Symbol       | Protein Name                                                          | Accession Number | Mol Weight (Da) | emPAI | Peptides Used / Unique | Ratio (Injured:Control) |
|--------------|-----------------------------------------------------------------------|------------------|-----------------|-------|------------------------|-------------------------|
| NFASC        | Neurofascin                                                           | IPI00329927.4    | 155723          | 0.04  | 3/2                    | 2.03                    |
| CSP/DNAJC5   | Cystine String Protein/Dnaj Homolog, Subfamily C, Member 5            | IPI00875866.1    | 28769           | 0.25  | 4/2                    | 1.76                    |
| DCLK1        | Doublecortin-Like Kinase 1                                            | IPI00468380.4    | 100794          | 0.07  | 5/2                    | 1.49                    |
| DNAJC6       | Aunxinillin/Dnaj Homolog, Subfamily C, Member 6                       | IPI00762713.1    | 123424          | 0.08  | 5/3                    | 1.45                    |
| ROCK2        | Rho-Associated Protein Kinase 2                                       | IPI00108150.1    | 206952          | 0.02  | 1/1                    | 1.45                    |
| ABLIM1       | Isoform 1 of Actin-Binding Lim Protein 1                              | IPI00467530.3    | 115052          | 0.03  | 1/1                    | 1.43                    |
| ANK3         | Ankyrin 3, Node of Ranvier (Ankyrin G)                                | IPI00623506.3    | 577303          | 0.01  | 4/2                    | 1.43                    |
| GLO1         | Glyoxalase I                                                          | IPI00321734.7    | 26747           | 0.42  | 6/2                    | 1.42                    |
| GDA          | Guanine Deaminase                                                     | IPI00469987.3    | 59707           | 0.17  | 4/3                    | 1.42                    |
| CCT7/TCP1    | T-Complex Protein 1 Subunit Beta                                      | IPI00331174.5    | 73208           | 0.09  | 1/1                    | 1.40                    |
| HIST2H2AC/AB | Histone H2A Type 2-C                                                  | IPI00272033.3    | 18543           | 0.95  | 4/2                    | 1.40                    |
| HTT          | Huntingtin                                                            | IPI00271166.4    | 385122          | 0.01  | 1/1                    | 1.39                    |
| SGTA         | Small Glutamine-Rich Tetratricopeptide Repeat (Tpr)-Containing, Alpha | IPI00116331.1    | 38788           | 0.28  | 7/2                    | 1.38                    |
| CFL1         | Cofilin 1 (Non-Muscle)                                                | IPI00890117.1    | 26685           | 0.80  | 9/3                    | 1.34                    |
| DLG1         | Loc100047603 Isoform 1 of Disks Large Homolog 1                       | IPI00408668.2    | 117797          | 0.03  | 1/1                    | 1.34                    |
| WDR7         | Wd Repeat Domain 7                                                    | IPI00653237.2    | 183911          | 0.05  | 7/3                    | 1.32                    |
| GAD2         | Glutamate Decarboxylase 2 (Pancreatic Islets And Brain, 65Kda)        | IPI00318522.3    | 77901           | 0.28  | 11/4                   | 1.31                    |
| D10Jhu81e    | Es1 Protein Homolog, Mitochondrial                                    | IPI00133284.1    | 34499           | 0.20  | 3/2                    | 1.31                    |
| USP9X        | Ubiquitin Specific Peptidase 9, X-Linked                              | IPI00798468.1    | 334392          | 0.02  | 3/2                    | 1.29                    |
| CLTB         | Clathrin, Light Chain (Lcb)                                           | IPI00554923.1    | 28446           | 0.39  | 4/3                    | 1.29                    |
| RAB2A        | Rab2A, Member Ras Oncogene Family                                     | IPI00137227.1    | 27658           | 0.26  | 4/2                    | 1.28                    |
| DMXL2        | Dmx-Like 2                                                            | IPI00896744.1    | 392746          | 0.03  | 11/2                   | 1.26                    |
| SPTBN2       | Beta Iii Spectrin                                                     | IPI00134344.6    | 309135          | 0.05  | 6/5                    | 1.23                    |
| MYO5A        | Myosin Va (Heavy Chain 12, Myosin)                                    | IPI00118120.1    | 267915          | 0.08  | 14/6                   | 1.23                    |
| NAPG         | N-Ethylmaleimide-Sensitive Factor Attachment Protein, Gamma           | IPI00881096.1    | 49418           | 0.38  | 12/4                   | 1.22                    |
| INA          | Internexin Neuronal Intermediate Filament Protein, Alpha              | IPI00135965.2    | 63789           | 0.42  | 12/6                   | 1.22                    |
| DPYSL4       | Dihydropyrimidinase-Like 4                                            | IPI00313151.3    | 72227           | 0.14  | 5/3                    | 1.21                    |
| PDXK         | Pyridoxal (Pyridoxine, Vitamin B6) Kinase                             | IPI00283511.1    | 40753           | 0.73  | 17/5                   | 1.20                    |
| PGM1/2       | Phosphoglucomutase-1                                                  | IPI00929850.1    | 72920           | 0.09  | 6/2                    | 0.80                    |
| OGDH         | Oxoglutarate (Alpha-Ketoglutarate) Dehydrogenase (Lipoamide)          | IPI00420882.3    | 135060          | 0.05  | 5/2                    | 0.79                    |
| ACSL6        | Acyl-Coa Synthetase Long-Chain Family Member 6                        | IPI00625955.1    | 93291           | 0.19  | 15/3                   | 0.79                    |
| ATP6V1F      | Atpase, H+ Transporting, Lysosomal 14Kda, V1 Subunit F                | IPI00315999.4    | 15491           | 0.81  | 7/2                    | 0.79                    |
| PRKAR2B      | Protein Kinase, Camp-Dependent, Regulatory, Type Ii, Beta             | IPI00224570.3    | 53534           | 0.35  | 19/4                   | 0.78                    |
| LOC100044138 | Similar To Cdcrel-1Ai                                                 | IPI00850740.1    | 53675           | 0.35  | 11/5                   | 0.78                    |
| CALB2        | Calbindin 2                                                           | IPI00119346.1    | 39680           | 0.17  | 3/2                    | 0.78                    |
| CNP          | 2',3'-Cyclic Nucleotide 3' Phosphodiesterase                          | IPI00319602.3    | 60878           | 2.54  | 87/17                  | 0.77                    |
| NDUFA4       | Nadh Dehydrogenase (Ubiquinone) 1 Alpha Subcomplex, 4, 9Kda           | IPI00125929.2    | 12059           | 0.65  | 3/2                    | 0.74                    |
| PDP1         | Pyruvate Dehydrogenase Phosphatase Catalytic Subunit 1                | IPI00672824.3    | 68709           | 0.10  | 5/2                    | 0.73                    |
| NAGA         | N-Acetylgalactosaminidase, Alpha-                                     | IPI00315593.4    | 53497           | 0.13  | 7/2                    | 0.73                    |
| IGSF8        | Immunoglobulin Superfamily, Member 8                                  | IPI00321348.3    | 69856           | 0.15  | 11/3                   | 0.73                    |
| GAD1         | Glutamate Decarboxylase 1 (Brain, 67Kda)                              | IPI00318496.1    | 79819           | 0.08  | 5/2                    | 0.71                    |
| KIF5C        | Kinesin Family Member 5C                                              | IPI00421137.3    | 138339          | 0.05  | 2/2                    | 0.70                    |
| HIBCH        | 3-Hydroxyisobutyryl-Coa Hydrolase, Mitochondrial                      | IPI00154047.1    | 51509           | 0.06  | 1/1                    | 0.70                    |
| INPP4A       | Isoform 1 of Type I Inositol-3,4-Bisphosphate 4-Phosphatase           | IPI00110426.1    | 121500          | 0.05  | 1/1                    | 0.67                    |
| ALDH1A1      | Aldehyde Dehydrogenase 1 Family, Member A1                            | IPI00626662.3    | 67532           | 0.15  | 5/2                    | 0.59                    |
| SIRT2        | Isoform 1 of Nad-Dependent Deacetylase Sirtuin-2                      | IPI00110265.1    | 52069           | 0.06  | 1/1                    | 0.52                    |
| UBR4         | Isoform 1 of E3 Ubiquitin-Protein Ligase Ubr4 (A.K.A P600)            | IPI00378681.6    | 666494          | N/A   | 1/1                    | 0.39                    |
