# Supplementary material for: Combining Comparative Proteomics and Molecular Genetics Uncovers Regulators of Synaptic and Axonal Stability and Degeneration In Vivo
Source: PubMed Central journal article supplement (PMC3431337; doi:10.1371/journal.pgen.1002936), 2012-08-30
Supplement: pgen.1002936.s004.pdf [file pgen.1002936.s004.pdf]

Table S4: Systems level analysis of functional clustering of proteins modified in degenerating synapses (networks identified as statistically significant clusters [P<0.05], IPA analysis)

|                         | Functional Annotation                        | Number of Proteins | % of Candidate List            | Proteins                                                                                                                                                                                                                                    |
|-------------------------|----------------------------------------------|--------------------|--------------------------------|---------------------------------------------------------------------------------------------------------------------------------------------------------------------------------------------------------------------------------------------|
| <b>Disease/Disorder</b> | Neurological Disorder                        | 35                 | 54.7                           | ABLIM1, ALDH1A1, ANK3, CALB2, CLTB, CNP, DARS, DCLK1, DNAJC5, DNAJC6, GAD1, GAD2, GLO1, GRM3, HIBCH, HTT, HUWE1, IGSF8, INA, INPP4A, MYO5A, NAGA, NAPG, NRCAM, PDP1, PDXK, PEX14, PIP5K1C, PRKAR2B, PSMD13, ROCK2, SGTA, SPTBN2, UBR4, WDR7 |
|                         | Metabolic Disorder                           | 24                 | 37.5                           | ABLIM1, ALDH1A1, ANK3, ANKFY1, ASAH1, DCLK1, DMXL2, DPYSL5, EPB41L1, GAD2, GRM3, HIBCH, HTT, IVD, MCCC2, NAGA, NIF3L1, NRCAM, OLA1, PDP1, PEX14, PHGDH, TLN1, WDR7                                                                          |
|                         | Movement disorder                            | 11                 | 17.2                           | ANK3, CNP, GAD2, MYO5A, PDP1, PDXK, PRKAR2B, ROCK2, SGTA, UBR4, WDR7                                                                                                                                                                        |
|                         | Alzheimer's Disease                          | 11                 | 17.2                           | ANK3, CNP, DARS, GAD2, GRM3, HTT, IGSF8, PEX14, PRKAR2B, PSMD13, WDR7                                                                                                                                                                       |
|                         | Neuromuscular Disease                        | 10                 | 15.6                           | CNP, GAD2, MYO5A, PDP1, PDXK, PRKAR2B, ROCK2, SGTA, UBR4, WDR7                                                                                                                                                                              |
|                         | Huntington's Disease                         | 5                  | 7.8                            | GAD2, MYO5A, PDP1, ROCK2, SGTA                                                                                                                                                                                                              |
|                         | Parkinson's Disease                          | 5                  | 7.8                            | CNP, PDXK, PRKAR2B, UBR4, WDR7                                                                                                                                                                                                              |
| Schizophrenia           | 5                                            | 7.8                | CLTB, CNP, GAD1, GAD2, PRKAR2B |                                                                                                                                                                                                                                             |
| <b>Cellular Process</b> | Synaptic Transmission                        | 7                  | 10.9                           | CNP, DNAJC5, GAD1, GAD2, GRM3, HTT, MYO5A                                                                                                                                                                                                   |
|                         | Neurogenesis                                 | 7                  | 10.9                           | ACSL6, DCLK1, DPYSL4, DPYSL5, GDA, HTT, PLXNA4                                                                                                                                                                                              |
|                         | Modification of Amino Acids                  | 7                  | 10.9                           | CFL1, DCLK1, GAD1, GAD2, PDP1, PRKAR2B, ROCK2                                                                                                                                                                                               |
|                         | Guidance of Axons                            | 6                  | 9.4                            | ABLIM1, ANK3, DPYSL5, KIF5C, NFASC, NRCAM                                                                                                                                                                                                   |
|                         | Formation of Filaments                       | 6                  | 9.4                            | CFL1, CNP, HTT, INA, ROCK2, TLN1                                                                                                                                                                                                            |
|                         | Development of Neurites                      | 5                  | 7.8                            | CNP, DCLK1, PHGDH, PIP5K1C, ROCK2                                                                                                                                                                                                           |
|                         | Assembly of Filaments                        | 5                  | 7.8                            | CFL1, CNP, HTT, ROCK2, TLN1                                                                                                                                                                                                                 |
|                         | Biogenesis of Cytoskeleton                   | 5                  | 7.8                            | CFL1, CNP, INA, ROCK2, TLN1                                                                                                                                                                                                                 |
|                         | Inhibition of Apoptosis                      | 5                  | 7.8                            | CFL1, GLO1, HTT, NOL3, PDXK                                                                                                                                                                                                                 |
|                         | Exocytosis                                   | 4                  | 6.3                            | DNAJC5, HTT, MYO5A, PIP5K1C                                                                                                                                                                                                                 |
|                         | Transport of Vesicles                        | 4                  | 6.3                            | HTT, MYO5A, NAPG, SPTBN2                                                                                                                                                                                                                    |
|                         | Movement of Neurons                          | 4                  | 6.3                            | CFL1, DCLK1, GAD1, PIP5K1C                                                                                                                                                                                                                  |
|                         | Biogenesis of Synapse                        | 3                  | 4.7                            | ANK3, MYO5A, NFASC                                                                                                                                                                                                                          |
|                         | Quantity of Phosphatidylinositol Diphosphate | 3                  | 4.7                            | INPP4A, PIP5K1C, ROCK2                                                                                                                                                                                                                      |
|                         | Formation of Vesicles                        | 3                  | 4.7                            | HTT, PIP5K1C, ROCK2                                                                                                                                                                                                                         |
|                         | Import of Protein                            | 3                  | 4.7                            | CFL1, HTT, PEX14                                                                                                                                                                                                                            |
|                         | Biogenesis of Actin Cytoskeleton             | 3                  | 4.7                            | CFL1, ROCK2, TLN1                                                                                                                                                                                                                           |
|                         | Proliferation of Neurons                     | 3                  | 4.7                            | ACSL6, CFL1, CNP                                                                                                                                                                                                                            |
|                         | Neurodegeneration                            | 3                  | 4.7                            | CNP, DNAJC5, HTT                                                                                                                                                                                                                            |
|                         | Development of Axons                         | 3                  | 4.7                            | CNP, DCLK1, PIP5K1C                                                                                                                                                                                                                         |
